# Supplementary material for: Model Cell Lines and Tissues of Different HGSOC Subtypes Differ in Local Estrogen Biosynthesis
Source: MDPI journal article supplement (doi:10.3390/cancers14112583), 2022-05-24
Supplement: s1 [file s1]

# Supplementary Material: Model Cell Lines and Tissues of Different HGSOC Subtypes Differ in Local Estrogen Biosynthesis

Renata Pavlič, Marija Gjorgoska, Tea Lanišnik Rižner

**Supplementary Table S1:** R code used for hierarchical clustering.

---

```
> library("ComplexHeatmap")

> dim(all_genes_all_samples_log2)
> my_matrix <- as.matrix(all_genes_all_samples_log2[,c(2:50)])
> treatment_info <- data.frame(treatment = all_genes_all_samples_log2$SAMPLE_ID)
> my_matrix <- t(my_matrix)
> ht= Heatmap(my_matrix,
  cluster_columns = T,
  row_names_side = "left",
  row_dend_side = "left",
  row_dend_width = unit(2,"cm"),
  row_names_gp = gpar(fontsize = 10.5,fontface="italic"),
  column_names_gp = gpar(fontsize = 12),
  column_names_side = "bottom",
  clustering_distance_rows = "euclidean",
  clustering_method_rows = "ward.D",
  clustering_distance_columns = "euclidean",
  clustering_method_columns = "ward.D",
  show_column_names = T,
  width = unit(5, "cm"),

  heatmap_legend_param = list(title="mRNA,RSEM(log2_transformed)",
    title_gp=gpar(fontsize=10.5),
    labels_gp = gpar(fontsize = 10.5),
    title_position = "topcenter",
    legend_width=unit(3,"cm"),
    legend_direction="horizontal"))
> draw(ht,heatmap_legend_side="bottom")
```

---

**Supplementary Table S2:** Normalized mRNA values of evaluated genes in cell lines HIO-80, OVSAHO, Kuramochi, and COV362, normalized to the expression of *POLR2A* and *RPLP0*.

|                    | <b>HIO-80</b>                |           | <b>OVSAHO</b>                |           | <b>Kuramochi</b>             |           | <b>COV362</b>                |            |
|--------------------|------------------------------|-----------|------------------------------|-----------|------------------------------|-----------|------------------------------|------------|
|                    | <b>Normalized</b>            |           | <b>Normalized</b>            |           | <b>Normalized</b>            |           | <b>Normalized</b>            |            |
|                    | <b>RNA x 10<sup>12</sup></b> | <b>SD</b>  |
| <i>ABCC1</i>       | 255064.75                    | 45182.04  | 209257.07                    | 78746.21  | 248511.31                    | 79832.68  | 401018.15                    | 28250.79   |
| <i>ABCC11</i>      | 0.00                         | 0.00      | 0.00                         | 0.00      | 0.00                         | 0.00      | 0.00                         | 0.00       |
| <i>ABCC4</i>       | 20843.40                     | 2667.48   | 62792.98                     | 36864.07  | 10082.45                     | 1629.39   | 12946.02                     | 1896.82    |
| <i>ABCG2</i>       | 109955.69                    | 14418.96  | 4158.86                      | 2348.07   | 719.29                       | 431.79    | 103349.34                    | 8274.44    |
| <i>AKR1C3</i>      | 2877.78                      | 227.62    | 230.08                       | 56.12     | 4120.23                      | 1317.78   | 80115.66                     | 14717.16   |
| <i>COMT</i>        | 534721.43                    | 80311.08  | 153416.57                    | 68543.36  | 380204.00                    | 54176.75  | 163003.43                    | 47587.76   |
| <i>CYP19A1</i>     | 0.00                         | 0.00      | 7.20                         | 12.47     | 0.00                         | 0.00      | 69.76                        | 16.69      |
| <i>CYP1A1</i>      | 4166.47                      | 474.46    | 7186.04                      | 5064.85   | 433.63                       | 607.59    | 12378.74                     | 2244.27    |
| <i>CYP1A2</i>      | 0.00                         | 0.00      | 0.00                         | 0.00      | 0.00                         | 0.00      | 3.81                         | 6.60       |
| <i>CYP1B1</i>      | 38741.33                     | 4383.29   | 16452.79                     | 7985.74   | 236635.26                    | 74763.25  | 149195.88                    | 20079.76   |
| <i>CYP3A5</i>      | 280.96                       | 37.78     | 0.00                         | 0.00      | 0.00                         | 0.00      | 0.00                         | 0.00       |
| <i>CYP3A7</i>      | 44.20                        | 25.52     | 0.00                         | 0.00      | 0.00                         | 0.00      | 0.00                         | 0.00       |
| <i>ESR1</i>        | 1913.44                      | 1047.10   | 704009.44                    | 402645.14 | 1917.02                      | 753.18    | 210087.08                    | 16732.54   |
| <i>ESR2</i>        | 1706.56                      | 249.93    | 1435.86                      | 554.46    | 1188.18                      | 445.76    | 8078.48                      | 1135.93    |
| <i>GPER v2</i>     | 99.89                        | 42.14     | 57.23                        | 30.52     | 1355.94                      | 195.53    | 1275.96                      | 285.04     |
| <i>GPER v3, v4</i> | 10.38                        | 5.08      | 30.38                        | 14.54     | 968.09                       | 286.23    | 375.13                       | 131.23     |
| <i>GSTP1</i>       | 1925678.85                   | 155444.07 | 1423724.35                   | 70951.57  | 1694448.48                   | 261890.22 | 4080494.29                   | 491527.46  |
| <i>HSD17B1</i>     | 40.51                        | 21.11     | 19.12                        | 11.63     | 72.73                        | 51.87     | 0.00                         | 0.00       |
| <i>HSD17B10</i>    | 248138.15                    | 40563.89  | 512076.41                    | 44864.03  | 188189.33                    | 40254.61  | 240512.23                    | 33896.12   |
| <i>HSD17B12</i>    | 359565.55                    | 48178.08  | 596976.04                    | 66860.61  | 566296.21                    | 18766.52  | 851396.97                    | 42342.92   |
| <i>HSD17B14</i>    | 1317.51                      | 72.92     | 2093.44                      | 750.22    | 7371.02                      | 2620.78   | 9315.13                      | 2824.36    |
| <i>HSD17B2</i>     | 82.22                        | 71.27     | 0.00                         | 0.00      | 88.28                        | 152.90    | 1157.18                      | 240.92     |
| <i>HSD17B4</i>     | 503264.73                    | 43130.43  | 538450.29                    | 45056.71  | 284167.02                    | 18513.63  | 199467.36                    | 13440.46   |
| <i>HSD17B7</i>     | 452643.40                    | 130628.04 | 167790.69                    | 29333.10  | 289001.57                    | 56357.43  | 431532.04                    | 66633.63   |
| <i>HSD17B8</i>     | 1935.81                      | 342.39    | 3133.39                      | 915.73    | 7123.08                      | 1334.49   | 6347.56                      | 486.06     |
| <i>HSD3B1</i>      | 81.41                        | 20.13     | 0.00                         | 0.00      | 4.91                         | 8.50      | 0.00                         | 0.00       |
| <i>HSD3B2</i>      | 0.00                         | 0.00      | 8.44                         | 8.29      | 10.24                        | 9.34      | 0.00                         | 0.00       |
| <i>NQO1</i>        | 1801461.13                   | 169802.00 | 261003.25                    | 56251.58  | 362281.62                    | 58851.87  | 3750066.73                   | 1203603.02 |
| <i>NQO2</i>        | 11041.48                     | 1280.71   | 5374.98                      | 1383.29   | 8766.55                      | 2334.51   | 5359.44                      | 212.16     |

|                 |           |          |          |          |          |          |           |          |
|-----------------|-----------|----------|----------|----------|----------|----------|-----------|----------|
| <i>SLC10A6</i>  | 51.04     | 11.42    | 33.42    | 21.54    | 55.63    | 13.44    | 9.19      | 4.37     |
| <i>SLC22A11</i> | 1427.13   | 970.74   | 2308.47  | 2501.34  | 2112.59  | 605.71   | 3016.40   | 902.61   |
| <i>SLC22A7</i>  | 85.72     | 27.56    | 91.23    | 118.20   | 32.51    | 28.19    | 65.02     | 26.06    |
| <i>SLC22A8</i>  | 88.51     | 30.92    | 151.53   | 141.51   | 205.74   | 101.53   | 160.20    | 99.89    |
| <i>SLC22A9</i>  | 101.23    | 16.49    | 621.62   | 616.89   | 274.66   | 59.96    | 361.09    | 81.62    |
| <i>SLC51A</i>   | 1352.09   | 85.93    | 4255.89  | 3309.45  | 4142.97  | 148.02   | 2057.23   | 960.19   |
| <i>SLC51B</i>   | 11.72     | 7.85     | 209.14   | 75.21    | 258.33   | 49.26    | 160.65    | 31.02    |
| <i>SLCO1A2</i>  | 119.14    | 12.20    | 193.26   | 119.24   | 1270.41  | 728.11   | 8.20      | 8.85     |
| <i>SLCO1B1</i>  | 0.00      | 0.00     | 0.00     | 0.00     | 0.00     | 0.00     | 0.00      | 0.00     |
| <i>SLCO1B3</i>  | 1997.97   | 497.28   | 26.47    | 45.85    | 666.01   | 160.86   | 2764.72   | 600.05   |
| <i>SLCO1C1</i>  | 4.01      | 6.95     | 23.06    | 23.48    | 103.24   | 71.03    | 37.97     | 31.89    |
| <i>SLCO2B1</i>  | 688.74    | 182.35   | 186.85   | 255.56   | 975.76   | 606.90   | 9111.07   | 2200.90  |
| <i>SLCO3A1</i>  | 204.47    | 181.81   | 784.03   | 801.76   | 189.13   | 170.94   | 994.42    | 449.22   |
| <i>SLCO4A1</i>  | 1796.37   | 145.12   | 37951.27 | 21775.58 | 8393.78  | 1610.82  | 65542.01  | 7427.61  |
| <i>SLCO4C1</i>  | 12270.28  | 3808.45  | 1410.05  | 452.87   | 2310.55  | 719.37   | 554.25    | 53.89    |
| <i>STS</i>      | 119275.51 | 11839.59 | 38065.91 | 15348.03 | 60174.97 | 23066.40 | 108653.55 | 11717.34 |
| <i>SULT1A1</i>  | 0.00      | 0.00     | 0.00     | 0.00     | 0.00     | 0.00     | 0.00      | 0.00     |
| <i>SULT1E1</i>  | 70.36     | 22.86    | 51.27    | 20.64    | 929.30   | 264.22   | 1072.70   | 498.15   |
| <i>SULT2A1</i>  | 0.00      | 0.00     | 0.00     | 0.00     | 0.00     | 0.00     | 7.72      | 13.37    |
| <i>SULT2B1</i>  | 159.87    | 11.27    | 189.60   | 13.22    | 73.75    | 16.61    | 327.85    | 59.02    |
| <i>UGT2B7</i>   | 0.00      | 0.00     | 0.00     | 0.00     | 0.00     | 0.00     | 0.00      | 0.00     |

**Supplementary Table S3:** Evaluated transporters and HSD17B enzymes with  $K_M$  values for the transport of E1-S and transformations of E1 (to E2), E2 (to E1), or testosterone (to androstenedione).

| Genes                            | Proteins           | $K_M$                                                      |
|----------------------------------|--------------------|------------------------------------------------------------|
| <i>ABCC1</i>                     | MRP1               | E1-S: 0.7-4.2 $\mu$ M (summarized in Pavlič et al., 2021)  |
| <i>ABCC11</i>                    | MRP8               | E1-S: > 150 $\mu$ M (Bortfeld et al., 2006)                |
| <i>ABCC4</i>                     | MRP4               | E1-S: NA                                                   |
| <i>ABCG2</i>                     | BCRP               | E1-S: 6.8-16.6 $\mu$ M (summarized in Pavlič et al., 2021) |
| <i>HSD17B1</i>                   | HSD17B1            | E1: 0.9 $\mu$ M (Puranen et al., 1997)                     |
| <i>HSD17B10</i>                  | HSD17B10           | E2: NA                                                     |
|                                  |                    | Testosterone: NA                                           |
| <i>HSD17B12</i>                  | HSD17B12           | E1: 3.5 $\mu$ M (Luu-The et al., 2006)                     |
| <i>HSD17B14</i>                  | HSD17B14           | E2: 5.6 $\mu$ M (Lukacik et al., 2007)                     |
|                                  |                    | Testosterone: 470 $\mu$ M (Lukacik et al., 2007)           |
| <i>HSD17B2</i>                   | HSD17B2            | E2: 0.21 $\mu$ M (Wu et al., 1993)                         |
|                                  |                    | Testosterone: 0.39 $\mu$ M (Wu et al., 1993)               |
| <i>HSD17B4</i>                   | HSD17B4            | E2: NA                                                     |
| <i>HSD17B7</i>                   | HSD17B7            | E1: 3.25 $\mu$ M (Törn et al., 2003)                       |
| <i>HSD17B8</i>                   | HSD17B8            | E2: NA                                                     |
|                                  |                    | Testosterone: NA                                           |
| <i>SLC10A6</i>                   | SOAT               | E1-S: 12 $\mu$ M (Karakus et al., 2018)                    |
| <i>SLC22A11</i>                  | OAT4               | E1-S: 1-22 $\mu$ M (summarized in Pavlič et al., 2021)     |
| <i>SLC22A7</i>                   | OAT2               | E1-S: NA                                                   |
| <i>SLC22A8</i>                   | OAT3               | E1-S: 2.2-21 $\mu$ M (summarized in Pavlič et al., 2021)   |
| <i>SLC22A9</i>                   | OAT7               | E1-S: 8.7 $\mu$ M (summarized in Pavlič et al., 2021)      |
| <i>SLC51A</i> ,<br><i>SLC15B</i> | OST $\alpha/\beta$ | E1-S: 320 $\mu$ M (summarized in Pavlič et al., 2021)      |
| <i>SLCO1A2</i>                   | OATP1A2            | E1-S: 7-59 $\mu$ M (summarized in Pavlič et al., 2021)     |
| <i>SLCO1B1</i>                   | OATP1B1            | E1-S: 0.1-45 $\mu$ M (summarized in Pavlič et al., 2021)   |
| <i>SLCO1B3</i>                   | OATP1B3            | E1-S: 5-58 $\mu$ M (summarized in Pavlič et al., 2021)     |
| <i>SLCO1C1</i>                   | OATP1C1            | E1-S: NA                                                   |
| <i>SLCO2B1</i>                   | OATP2B1            | E1-S: 1.6-21 $\mu$ M (summarized in Pavlič et al., 2021)   |
| <i>SLCO3A1</i>                   | OATP3A1            | E1-S: NA                                                   |
| <i>SLCO4A1</i>                   | OATP4A1            | E1-S: NA                                                   |
| <i>SLCO4C1</i>                   | OATP4C1            | E1-S: 27 $\mu$ M (summarized in Pavlič et al., 2021)       |

Pavlič et al., 2021, doi 10.3390/ijms22083819; Bortfeld et al., 2006, 10.1016/j.neuroscience.2005.10.025; Puranen et al., 1997, 10.1210/mend.11.1.9872; Luu-The et al., 2006, doi: 10.1210/me.2005-0058; Lukacik et al., 2007, doi: 10.1042/BJ20061319; Wu et al., 1993, PMID: 8099587; Törn et al., 2003, doi: 10.1016/s0006-291x(03)00694-6; Karakus et al., 2018, doi: 10.3389/fphar.2018.00941; NA, no data available.

**Supplementary Table S4:** Comparison of gene expressions in cell lines compared to each other, presented as fold regulation (FR).

|             | OVSAHO/HIO-80 |         |    | Kuramochi/HIO-80 |         |    | COV362/HIO-80 |         |    | Kuramochi/OVSAHO |         |    | COV362/OVSAHO |         |    | COV362/Kuramochi |         |    |
|-------------|---------------|---------|----|------------------|---------|----|---------------|---------|----|------------------|---------|----|---------------|---------|----|------------------|---------|----|
|             | FR            | p value |    | FR               | p value |    | FR            | p value |    | FR               | p value |    | FR            | p value |    | FR               | p value |    |
| ABCC1       | -1.22         | >0.9999 | ns | -1.03            | >0.9999 | ns | 1.57          | 0.5366  | ns | 1.19             | >0.9999 | ns | 1.92          | 0.1412  | ns | 1.61             | 0.1887  | ns |
| ABCC11      |               |         | ns |                  |         | ns |               |         | ns |                  |         | ns |               |         | ns |                  |         | ns |
| ABCC4       | 3.01          | >0.9999 | ns | -2.07            | 0.3255  | ns | -1.61         | >0.9999 | ns | -6.23            | 0.0194  | *  | -4.85         | 0.1887  | ns | 1.28             | >0.9999 | ns |
| ABCG2       | -26.44        | 0.6775  | ns | -152.87          | 0.0552  | ns | -1.06         | >0.9999 | ns | -5.78            | >0.9999 | ns | 24.85         | 0.8462  | ns | 143.68           | 0.0764  | ns |
| AKR1C3      | -12.51        | >0.9999 | ns | 1.43             | >0.9999 | ns | 27.84         | 0.3255  | ns | 17.91            | 0.3255  | ns | 348.21        | 0.0134  | *  | 19.44            | >0.9999 | ns |
| COMT        | -3.49         | 0.0552  | ns | -1.41            | >0.9999 | ns | -3.28         | 0.0764  | ns | 2.48             | 0.6775  | ns | 1.06          | >0.9999 | ns | -2.33            | 0.8462  | ns |
| CYP19A1     |               | >0.9999 | ns |                  | >0.9999 | ns |               | 0.0517  | ns |                  | >0.9999 | ns | 9.69          | 0.2597  | ns |                  | 0.0517  | ns |
| CYP1A1      | 1.72          | >0.9999 | ns | -9.61            | >0.9999 | ns | 2.97          | 0.6775  | ns | -16.57           | 0.4202  | ns | 1.72          | >0.9999 | ns | 28.55            | 0.0194  | *  |
| CYP1A2      |               | >0.9999 | ns |                  | >0.9999 | ns |               | 0.9438  | ns |                  | >0.9999 | ns |               | 0.9438  | ns |                  | 0.9438  | ns |
| CYP1B1      | -2.35         | >0.9999 | ns | 6.11             | 0.3255  | ns | 3.85          | >0.9999 | ns | 14.38            | 0.0194  | *  | 9.07          | 0.1887  | ns | -1.59            | >0.9999 | ns |
| CYP3A5      |               | 0.0448  | *  |                  | 0.0448  | *  |               | 0.0448  | *  |                  | >0.9999 | ns |               | >0.9999 | ns |                  | >0.9999 | ns |
| CYP3A7      |               | 0.0448  | *  |                  | 0.0448  | *  |               | 0.0448  | *  |                  | >0.9999 | ns |               | >0.9999 | ns |                  | >0.9999 | ns |
| ESR1        | 367.93        | 0.0552  | ns | 1.00             | >0.9999 | ns | 109.80        | 0.6775  | ns | -367.24          | 0.0764  | ns | -3.35         | >0.9999 | ns | 109.59           | 0.8462  | ns |
| ESR2        | -1.19         | >0.9999 | ns | -1.44            | >0.9999 | ns | 4.73          | 0.8462  | ns | -1.21            | >0.9999 | ns | 5.63          | 0.1887  | ns | 6.80             | 0.0764  | ns |
| GPER v2     | -1.75         | >0.9999 | ns | 13.57            | 0.4202  | ns | 12.77         | 0.5366  | ns | 23.69            | 0.1045  | ns | 22.30         | 0.1412  | ns | -1.06            | >0.9999 | ns |
| GPER v3, v4 | 2.93          | >0.9999 | ns | 93.30            | 0.0134  | *  | 36.15         | 0.2492  | ns | 31.86            | 0.2492  | ns | 12.35         | >0.9999 | ns | -2.58            | >0.9999 | ns |
| GSTP1       | -1.35         | 0.5366  | ns | -1.14            | >0.9999 | ns | 2.12          | >0.9999 | ns | 1.19             | >0.9999 | ns | 2.87          | 0.0194  | *  | 2.41             | 0.3255  | ns |
| HSD17B1     | -2.12         | >0.9999 | ns | 1.80             | >0.9999 | ns |               | 0.1816  | ns | 3.80             | >0.9999 | ns |               | 0.8295  | ns |                  | 0.0727  | ns |
| HSD17B10    | 2.06          | 0.6775  | ns | -1.32            | >0.9999 | ns | -1.03         | >0.9999 | ns | -2.72            | 0.0279  | *  | -2.13         | 0.5366  | ns | 1.28             | >0.9999 | ns |
| HSD17B12    | 1.66          | 0.5366  | ns | 1.57             | >0.9999 | ns | 2.37          | 0.0134  | *  | -1.05            | >0.9999 | ns | 1.43          | >0.9999 | ns | 1.50             | 0.5366  | ns |
| HSD17B14    | 1.59          | >0.9999 | ns | 5.59             | 0.1412  | ns | 7.07          | 0.0279  | *  | 3.52             | >0.9999 | ns | 4.45          | 0.4202  | ns | 1.26             | >0.9999 | ns |
| HSD17B2     |               | >0.9999 | ns | 1.07             | >0.9999 | ns | 14.07         | 0.4781  | ns |                  | >0.9999 | ns |               | 0.0392  | *  | 13.11            | 0.2394  | ns |
| HSD17B4     | 1.07          | >0.9999 | ns | -1.77            | >0.9999 | ns | -2.52         | 0.1412  | ns | -1.89            | 0.4202  | ns | -2.70         | 0.0279  | *  | -1.42            | >0.9999 | ns |
| HSD17B7     | -2.70         | 0.0764  | ns | -1.57            | >0.9999 | ns | -1.05         | >0.9999 | ns | 1.72             | >0.9999 | ns | 2.57          | 0.0764  | ns | 1.49             | >0.9999 | ns |
| HSD17B8     | 1.62          | >0.9999 | ns | 3.68             | 0.0552  | ns | 3.28          | 0.1412  | ns | 2.27             | 0.4202  | ns | 2.03          | 0.8462  | ns | -1.12            | >0.9999 | ns |
| HSD3B1      |               | 0.0517  | ns | -16.60           | 0.2597  | ns |               | 0.0517  | ns |                  | >0.9999 | ns |               | >0.9999 | ns |                  | >0.9999 | ns |
| HSD3B2      |               | 0.8300  | ns |                  | 0.4792  | ns |               | >0.9999 | ns | 1.21             | >0.9999 | ns |               | 0.83    | ns |                  | 0.4792  | ns |
| NQO1        | -6.90         | 0.3255  | ns | -4.97            | >0.9999 | ns | 2.08          | >0.9999 | ns | 1.39             | >0.9999 | ns | 14.37         | 0.0194  | *  | 10.35            | 0.1887  | ns |
| NQO2        | -2.05         | 0.1412  | ns | -1.26            | >0.9999 | ns | -2.06         | 0.0764  | ns | 1.63             | >0.9999 | ns | -1.00         | >0.9999 | ns | -1.64            | 0.6775  | ns |
| SLC10A6     | -1.53         | >0.9999 | ns | 1.09             | >0.9999 | ns | -5.56         | 0.2492  | ns | 1.66             | 0.6775  | ns | -3.64         | >0.9999 | ns | -6.06            | 0.0552  | ns |
| SLC22A11    | 1.62          | >0.9999 | ns | 1.48             | >0.9999 | ns | 2.11          | 0.4202  | ns | -1.09            | >0.9999 | ns | 1.31          | >0.9999 | ns | 1.43             | >0.9999 | ns |
| SLC22A7     | 1.06          | >0.9999 | ns | -2.64            | 0.3676  | ns | -1.32         | >0.9999 | ns | -2.81            | >0.9999 | ns | -1.40         | >0.9999 | ns | 2.00             | >0.9999 | ns |
| SLC22A8     | 1.71          | >0.9999 | ns | 2.32             | >0.9999 | ns | 1.81          | >0.9999 | ns | 1.36             | >0.9999 | ns | 1.06          | >0.9999 | ns | -1.28            | >0.9999 | ns |
| SLC22A9     | 6.14          | 0.1412  | ns | 2.71             | 0.6775  | ns | 3.57          | 0.1412  | ns | -2.26            | >0.9999 | ns | -1.72         | >0.9999 | ns | 1.31             | >0.9999 | ns |

|                |        |         |    |       |         |    |        |         |    |       |         |    |        |         |    |         |         |    |
|----------------|--------|---------|----|-------|---------|----|--------|---------|----|-------|---------|----|--------|---------|----|---------|---------|----|
| <i>SLC51A</i>  | 3.15   | 0.5366  | ns | 3.06  | 0.0764  | ns | 1.52   | >0.9999 | ns | -1.03 | >0.9999 | ns | -2.07  | >0.9999 | ns | -2.01   | 0.8462  | ns |
| <i>SLC51B</i>  | 17.84  | 0.3255  | ns | 22.04 | 0.0279  | *  | 13.71  | >0.9999 | ns | 1.24  | >0.9999 | ns | -1.30  | >0.9999 | ns | -1.61   | 0.8462  | ns |
| <i>SLCO1A2</i> | 1.62   | >0.9999 | ns | 10.66 | 0.5366  | ns | -14.53 | >0.9999 | ns | 6.57  | >0.9999 | ns | -23.58 | 0.5366  | ns | -154.98 | 0.0134  | *  |
| <i>SLCO1B1</i> |        |         | ns |       |         | ns |        |         | ns |       |         | ns |        |         | ns |         |         | ns |
| <i>SLCO1B3</i> | -75.48 | 0.1869  | ns | -3.00 | >0.9999 | ns | 1.38   | >0.9999 | ns | 25.16 | >0.9999 | ns | 104.44 | 0.0191  | *  | 4.15    | 0.3229  | ns |
| <i>SLCO1C1</i> | 5.75   | >0.9999 | ns | 25.73 | 0.1354  | ns | 9.46   | 0.8295  | ns | 4.48  | >0.9999 | ns | 1.65   | >0.9999 | ns | -2.72   | >0.9999 | ns |
| <i>SLCO2B1</i> | -3.69  | >0.9999 | ns | 1.42  | >0.9999 | ns | 13.23  | 0.5366  | ns | 5.22  | 0.8462  | ns | 48.76  | 0.0194  | *  | 9.34    | 0.8462  | ns |
| <i>SLCO3A1</i> | 3.83   | >0.9999 | ns | -1.08 | >0.9999 | ns | 4.86   | 0.4724  | ns | -4.15 | 0.9374  | ns | 1.27   | >0.9999 | ns | 5.26    | 0.2829  | ns |
| <i>SLCO4A1</i> | 21.13  | 0.1887  | ns | 4.67  | >0.9999 | ns | 36.49  | 0.0194  | *  | -4.52 | >0.9999 | ns | 1.73   | >0.9999 | ns | 7.81    | 0.3255  | ns |
| <i>SLCO4C1</i> | -8.70  | 0.3255  | ns | -5.31 | >0.9999 | ns | -22.14 | 0.0134  | *  | 1.64  | >0.9999 | ns | -2.54  | >0.9999 | ns | -4.17   | 0.3255  | ns |
| <i>STS</i>     | -3.13  | 0.0395  | *  | -1.98 | 0.1887  | ns | -1.10  | >0.9999 | ns | 1.58  | >0.9999 | ns | 2.85   | 0.3255  | ns | 1.81    | >0.9999 | ns |
| <i>SULT1A1</i> |        |         | ns |       |         | ns |        |         | ns |       |         | ns |        |         | ns |         |         | ns |
| <i>SULT1E1</i> | -1.37  | >0.9999 | ns | 13.21 | 0.4202  | ns | 15.25  | 0.3255  | ns | 18.12 | 0.1887  | ns | 20.92  | 0.1412  | ns | 1.15    | >0.9999 | ns |
| <i>SULT2A1</i> |        | >0.9999 | ns |       | >0.9999 | ns |        | 0.9438  | ns |       | >0.9999 | ns |        | 0.9438  | ns |         | 0.9438  | ns |
| <i>SULT2B1</i> | 1.19   | >0.9999 | ns | -2.17 | >0.9999 | ns | 2.05   | 0.2492  | ns | -2.57 | 0.2492  | ns | 1.73   | >0.9999 | ns | 4.45    | 0.0134  | *  |
| <i>UGT2B7</i>  |        |         | ns |       |         | ns |        |         | ns |       |         | ns |        |         | ns |         |         | ns |

Statistical analysis: Kruskal-Wallis with Dunn's multiple comparisons test. \*,  $p < 0.05$ ; orange highlight, significantly down-regulated genes; blue highlight, significantly up-regulated genes.

**Supplementary Table S5:** Statistical analysis of LC-MS/MS results using Tukey's test. Formation of metabolites E1-S, E1, E2, and E2-S was compared in individual time points (8, 24, 48, 72 h) for all combinations of four cell lines (HIO-80, OVSAHO, Kuramochi, COV362).

| Formation of metabolites in cell lines | treatment   |      |             |    |            |     |
|----------------------------------------|-------------|------|-------------|----|------------|-----|
|                                        | 2.3 nM E1-S |      | 8.5 nM E1-S |    | 85 nM E1-S |     |
|                                        | p value     |      | p value     |    | p value    |     |
| E1-S, 8 h                              |             |      |             |    |            |     |
| HIO-80 / OVSAHO                        | 0,1050      | ns   | 0,9987      | ns | 0,9972     | ns  |
| HIO-80 / Kuramochi                     | 0,0022      | **   | 0,7244      | ns | 0,9916     | ns  |
| HIO-80 /COV362                         | <0,0001     | **** | 0,5347      | ns | 0,3258     | ns  |
| OVSAHO / Kuramochi                     | 0,9999      | ns   | 0,8240      | ns | 0,9979     | ns  |
| OVSAHO / COV362                        | 0,5187      | ns   | 0,6351      | ns | 0,2117     | ns  |
| Kuramochi / COV362                     | 0,0610      | ns   | 0,8177      | ns | 0,5337     | ns  |
| E1-S, 24 h                             |             |      |             |    |            |     |
| HIO-80 / OVSAHO                        | 0,1560      | ns   | 0,9092      | ns | 0,0426     | *   |
| HIO-80 / Kuramochi                     | 0,7846      | ns   | 0,3906      | ns | 0,4843     | ns  |
| HIO-80 /COV362                         | 0,5619      | ns   | 0,9996      | ns | 0,0203     | *   |
| OVSAHO / Kuramochi                     | 0,0554      | ns   | 0,0663      | ns | 0,3721     | ns  |
| OVSAHO / COV362                        | 0,9349      | ns   | 0,8565      | ns | 0,9602     | ns  |
| Kuramochi / COV362                     | 0,7840      | ns   | 0,4251      | ns | 0,1953     | ns  |
| E1-S, 48 h                             |             |      |             |    |            |     |
| HIO-80 / OVSAHO                        | 0,0193      | *    | 0,8247      | ns | 0,2239     | ns  |
| HIO-80 / Kuramochi                     | 0,0113      | *    | 0,1968      | ns | 0,9966     | ns  |
| HIO-80 /COV362                         | 0,6081      | ns   | 0,9999      | ns | 0,1067     | ns  |
| OVSAHO / Kuramochi                     | >0,9999     | ns   | 0,0238      | *  | 0,5652     | ns  |
| OVSAHO / COV362                        | 0,9488      | ns   | 0,9488      | ns | 0,8844     | ns  |
| Kuramochi / COV362                     | 0,9417      | ns   | 0,4083      | ns | 0,3609     | ns  |
| E1-S, 72 h                             |             |      |             |    |            |     |
| HIO-80 / OVSAHO                        | 0,0478      | *    | 0,1547      | ns | 0,0037     | **  |
| HIO-80 / Kuramochi                     | 0,9820      | ns   | 0,1631      | ns | 0,8106     | ns  |
| HIO-80 /COV362                         | 0,9961      | ns   | 0,6552      | ns | 0,3091     | ns  |
| OVSAHO / Kuramochi                     | 0,1591      | ns   | 0,0254      | *  | 0,0695     | ns  |
| OVSAHO / COV362                        | 0,1051      | ns   | 0,0823      | ns | 0,0677     | ns  |
| Kuramochi / COV362                     | 0,9710      | ns   | 0,2007      | ns | 0,3791     | ns  |
| E1, 8 h                                |             |      |             |    |            |     |
| HIO-80 / OVSAHO                        | 0,5662      | ns   | 0,1270      | ns | 0,3593     | ns  |
| HIO-80 / Kuramochi                     | 0,4031      | ns   | 0,8250      | ns | 0,0219     | *   |
| HIO-80 /COV362                         | 0,1811      | ns   | 0,9035      | ns | 0,1927     | ns  |
| OVSAHO / Kuramochi                     | 0,9695      | ns   | 0,1848      | ns | 0,9992     | ns  |
| OVSAHO / COV362                        | 0,4819      | ns   | 0,0740      | ns | 0,1785     | ns  |
| Kuramochi / COV362                     | 0,7530      | ns   | 0,1412      | ns | 0,0102     | *   |
| E1, 24 h                               |             |      |             |    |            |     |
| HIO-80 / OVSAHO                        | 0,9643      | ns   | 0,1543      | ns | 0,2021     | ns  |
| HIO-80 / Kuramochi                     | 0,5167      | ns   | 0,9499      | ns | 0,0037     | **  |
| HIO-80 /COV362                         | 0,9960      | ns   | 0,9957      | ns | 0,0002     | *** |
| OVSAHO / Kuramochi                     | 0,7009      | ns   | 0,0310      | *  | 0,9523     | ns  |
| OVSAHO / COV362                        | 0,9610      | ns   | 0,2657      | ns | 0,0227     | *   |
| Kuramochi / COV362                     | 0,9810      | ns   | 0,9160      | ns | 0,0003     | *** |

|                    |        |    |        |    |        |    |
|--------------------|--------|----|--------|----|--------|----|
| E1, 48 h           |        |    |        |    |        |    |
| HIO-80 / OVSAHO    | 0,0266 | *  | 0,0179 | *  | 0,0517 | ns |
| HIO-80 / Kuramochi | 0,9544 | ns | 0,9959 | ns | 0,4031 | ns |
| HIO-80 /COV362     | 0,2167 | ns | 0,1357 | ns | 0,0048 | ** |
| OVSAHO / Kuramochi | 0,0895 | ns | 0,0194 | *  | 0,3938 | ns |
| OVSAHO / COV362    | 0,0103 | *  | 0,0034 | ** | 0,0086 | ** |
| Kuramochi / COV362 | 0,6133 | ns | 0,1430 | ns | 0,0490 | *  |
| E1, 72 h           |        |    |        |    |        |    |
| HIO-80 / OVSAHO    | 0,1089 | ns | 0,0489 | *  | 0,0037 | ** |
| HIO-80 / Kuramochi | 0,7891 | ns | 0,3593 | ns | 0,1464 | ns |
| HIO-80 /COV362     | 0,3233 | ns | 0,0385 | *  | 0,0092 | ** |
| OVSAHO / Kuramochi | 0,7416 | ns | 0,9233 | ns | 0,0089 | ** |
| OVSAHO / COV362    | 0,0131 | *  | 0,0291 | *  | 0,0030 | ** |
| Kuramochi / COV362 | 0,2416 | ns | 0,3129 | ns | 0,0063 | ** |
| E2, 8 h            |        |    |        |    |        |    |
| HIO-80 / OVSAHO    | 0,3229 | ns | 0,1180 | ns | 0,7493 | ns |
| HIO-80 / Kuramochi | 0,9876 | ns | 0,4894 | ns | 0,1963 | ns |
| HIO-80 /COV362     | 0,0199 | *  | 0,0757 | ns | 0,0567 | ns |
| OVSAHO / Kuramochi | 0,9016 | ns | 0,0599 | ns | 0,3291 | ns |
| OVSAHO / COV362    | 0,0550 | ns | 0,0458 | *  | 0,0601 | ns |
| Kuramochi / COV362 | 0,5661 | ns | 0,9796 | ns | 0,0747 | ns |
| E2, 24 h           |        |    |        |    |        |    |
| HIO-80 / OVSAHO    | 0,8253 | ns | 0,8034 | ns | 0,0064 | ** |
| HIO-80 / Kuramochi | 0,7025 | ns | 0,5926 | ns | 0,2710 | ns |
| HIO-80 /COV362     | 0,7193 | ns | 0,4262 | ns | 0,0243 | *  |
| OVSAHO / Kuramochi | 0,3040 | ns | 0,5116 | ns | 0,0372 | *  |
| OVSAHO / COV362    | 0,2973 | ns | 0,4411 | ns | 0,0024 | ** |
| Kuramochi / COV362 | 0,9970 | ns | 0,6111 | ns | 0,0055 | ** |
| E2, 48 h           |        |    |        |    |        |    |
| HIO-80 / OVSAHO    | 0,0505 | ns | 0,0136 | *  | 0,0204 | *  |
| HIO-80 / Kuramochi | 0,7013 | ns | 0,4600 | ns | 0,3337 | ns |
| HIO-80 /COV362     | 0,6306 | ns | 0,0373 | *  | 0,0050 | ** |
| OVSAHO / Kuramochi | 0,9995 | ns | 0,0095 | ** | 0,0358 | *  |
| OVSAHO / COV362    | 0,0082 | ** | 0,0027 | ** | 0,0105 | *  |
| Kuramochi / COV362 | 0,4878 | ns | 0,6257 | ns | 0,0772 | ns |
| E2, 72 h           |        |    |        |    |        |    |
| HIO-80 / OVSAHO    | 0,0211 | *  | 0,0359 | *  | 0,0718 | ns |
| HIO-80 / Kuramochi | 0,6875 | ns | 0,3509 | ns | 0,0869 | ns |
| HIO-80 /COV362     | 0,8899 | ns | 0,0053 | ** | 0,0265 | *  |
| OVSAHO / Kuramochi | 0,6357 | ns | 0,9891 | ns | 0,0927 | ns |
| OVSAHO / COV362    | 0,0146 | *  | 0,0200 | *  | 0,0511 | ns |
| Kuramochi / COV362 | 0,5398 | ns | 0,2813 | ns | 0,0012 | ** |
| E2-S, 8 h          |        |    |        |    |        |    |
| HIO-80 / OVSAHO    | 0,9447 | ns | 0,9874 | ns | 0,9791 | ns |
| HIO-80 / Kuramochi | 0,0583 | ns | 0,9713 | ns | 0,9303 | ns |
| HIO-80 /COV362     | 0,0342 | *  | 0,9819 | ns | 0,0392 | *  |
| OVSAHO / Kuramochi | 0,2721 | ns | 0,8479 | ns | 0,8549 | ns |
| OVSAHO / COV362    | 0,1908 | ns | 0,9972 | ns | 0,0316 | *  |
| Kuramochi / COV362 | 0,5083 | ns | 0,8399 | ns | 0,6593 | ns |



|                    |         |    |        |    |        |    |
|--------------------|---------|----|--------|----|--------|----|
| E2-S, 24 h         |         |    |        |    |        |    |
| HIO-80 / OVSAHO    | 0,8097  | ns | 0,0678 | ns | 0,0443 | *  |
| HIO-80 / Kuramochi | 0,5220  | ns | 0,5073 | ns | 0,0835 | ns |
| HIO-80 / COV362    | 0,1431  | ns | 0,6547 | ns | 0,0151 | *  |
| OVSAHO / Kuramochi | >0,9999 | ns | 0,5235 | ns | 0,9960 | ns |
| OVSAHO / COV362    | 0,9224  | ns | 0,9975 | ns | 0,4927 | ns |
| Kuramochi / COV362 | 0,5164  | ns | 0,8874 | ns | 0,4573 | ns |
| E2-S, 48 h         |         |    |        |    |        |    |
| HIO-80 / OVSAHO    | 0,9237  | ns | 0,9686 | ns | 0,8938 | ns |
| HIO-80 / Kuramochi | 0,6336  | ns | 0,9315 | ns | 0,8619 | ns |
| HIO-80 / COV362    | 0,4909  | ns | 0,8975 | ns | 0,1899 | ns |
| OVSAHO / Kuramochi | 0,9591  | ns | 0,9937 | ns | 0,9892 | ns |
| OVSAHO / COV362    | 0,9064  | ns | 0,5749 | ns | 0,3162 | ns |
| Kuramochi / COV362 | 0,9984  | ns | 0,5413 | ns | 0,6006 | ns |
| E2-S, 72 h         |         |    |        |    |        |    |
| HIO-80 / OVSAHO    | 0,9808  | ns | 0,5826 | ns | 0,9034 | ns |
| HIO-80 / Kuramochi | 0,3509  | ns | 0,8669 | ns | 0,9876 | ns |
| HIO-80 / COV362    | 0,2994  | ns | 0,4589 | ns | 0,0129 | *  |
| OVSAHO / Kuramochi | 0,4176  | ns | 0,9943 | ns | 0,9892 | ns |
| OVSAHO / COV362    | 0,3432  | ns | 0,2679 | ns | 0,6645 | ns |
| Kuramochi / COV362 | 0,9991  | ns | 0,6389 | ns | 0,4080 | ns |

Statistical differences are highlighted in orange.

**Supplementary Table S6:** Levels of E1-S, E1, E2, and E2-S detected with LC-MS/MS after E1-S treatment (2.3, 8.5, and 85 nM) in cell lines HIO-80, OVSAHO, Kuramochi, and COV362.

| Treatment with 2.3 nM E1-S |           |        |         |        |           |        |         |        |
|----------------------------|-----------|--------|---------|--------|-----------|--------|---------|--------|
|                            | Cell line |        |         |        |           |        |         |        |
|                            | HIO-80    |        | OVSAHO  |        | Kuramochi |        | COV 362 |        |
|                            | mean      | SD     | mean    | SD     | mean      | SD     | mean    | SD     |
| <b>E1-S levels (ng/mL)</b> |           |        |         |        |           |        |         |        |
| 8 h                        | 36.500    | 1.299  | 28.025  | 4.834  | 28.200    | 1.867  | 24.225  | 1.473  |
| 24 h                       | 33.740    | 6.305  | 25.875  | 2.438  | 31.000    | 1.344  | 27.833  | 5.590  |
| 48 h                       | 35.540    | 2.919  | 28.325  | 2.396  | 28.275    | 1.729  | 30.375  | 7.469  |
| 72 h                       | 30.860    | 1.839  | 23.475  | 3.371  | 30.075    | 4.050  | 31.350  | 4.324  |
| <b>E1 levels (ng/mL)</b>   |           |        |         |        |           |        |         |        |
| 8 h                        | 0.259     | 0.120  | 0.159   | 0.084  | 0.133     | 0.071  | 0.090   | 0.022  |
| 24 h                       | 0.339     | 0.085  | 0.389   | 0.181  | 0.263     | 0.074  | 0.311   | 0.253  |
| 48 h                       | 0.380     | 0.078  | 0.609   | 0.091  | 0.339     | 0.148  | 0.217   | 0.122  |
| 72 h                       | 0.406     | 0.289  | 0.846   | 0.194  | 0.623     | 0.386  | 0.147   | 0.047  |
| <b>E2 levels (ng/mL)</b>   |           |        |         |        |           |        |         |        |
| 8 h                        | 0.141     | 0.027  | 0.241   | 0.094  | 0.170     | 0.164  | 0.029   | 0.018  |
| 24 h                       | 0.125     | 0.063  | 0.162   | 0.053  | 0.077     | 0.058  | 0.084   | 0.041  |
| 48 h                       | 0.090     | 0.046  | 0.174   | 0.030  | 0.167     | 0.131  | 0.060   | 0.022  |
| 72 h                       | 0.101     | 0.051  | 0.295   | 0.073  | 0.192     | 0.150  | 0.075   | 0.061  |
| <b>E2-S levels (ng/mL)</b> |           |        |         |        |           |        |         |        |
| 8 h                        | 1.985     | 0.303  | 2.198   | 0.727  | 1.353     | 0.196  | 1.193   | 0.079  |
| 24 h                       | 2.286     | 0.751  | 1.683   | 1.011  | 1.708     | 0.448  | 1.320   | 0.238  |
| 48 h                       | 2.400     | 0.943  | 2.013   | 0.935  | 1.728     | 0.706  | 1.658   | 0.523  |
| 72 h                       | 2.712     | 1.034  | 2.493   | 0.726  | 1.768     | 0.466  | 1.730   | 0.317  |
| Treatment with 8.5 nM E1-S |           |        |         |        |           |        |         |        |
|                            | Cell line |        |         |        |           |        |         |        |
|                            | HIO-80    |        | OVSAHO  |        | Kuramochi |        | COV 362 |        |
|                            | mean      | SD     | mean    | SD     | mean      | SD     | mean    | SD     |
| <b>E1-S levels (ng/mL)</b> |           |        |         |        |           |        |         |        |
| 8 h                        | 102.425   | 24.024 | 104.950 | 24.320 | 116.000   | 5.657  | 121.000 | 5.657  |
| 24 h                       | 103.275   | 20.637 | 95.200  | 13.413 | 123.000   | 4.243  | 104.750 | 20.123 |
| 48 h                       | 103.900   | 16.354 | 95.875  | 8.955  | 126.500   | 4.950  | 102.925 | 25.414 |
| 72 h                       | 110.000   | 7.257  | 83.800  | 17.509 | 147.500   | 10.607 | 116.500 | 8.185  |
| <b>E1 levels (ng/mL)</b>   |           |        |         |        |           |        |         |        |
| 8 h                        | 0.257     | 0.157  | 0.577   | 0.179  | 0.326     | 0.021  | 0.205   | 0.001  |
| 24 h                       | 0.704     | 0.389  | 1.288   | 0.120  | 0.809     | 0.083  | 0.628   | 0.561  |
| 48 h                       | 1.018     | 0.244  | 1.850   | 0.285  | 0.988     | 0.088  | 0.459   | 0.339  |
| 72 h                       | 1.087     | 0.209  | 3.430   | 0.997  | 4.095     | 1.407  | 0.584   | 0.169  |
| <b>E2 levels (ng/mL)</b>   |           |        |         |        |           |        |         |        |
| 8 h                        | 0.132     | 0.037  | 0.281   | 0.090  | 0.069     | 0.043  | 0.058   | 0.006  |
| 24 h                       | 0.303     | 0.194  | 0.532   | 0.466  | 0.171     | 0.009  | 0.126   | 0.066  |
| 48 h                       | 0.174     | 0.034  | 0.462   | 0.088  | 0.111     | 0.041  | 0.062   | 0.047  |

|                                  |          |               |          |                  |          |                |          |         |
|----------------------------------|----------|---------------|----------|------------------|----------|----------------|----------|---------|
| 72 h                             | 0.231    | 0.046         | 0.911    | 0.257            | 0.843    | 0.279          | 0.061    | 0.031   |
| <b>E2-S levels (ng/mL)</b>       |          |               |          |                  |          |                |          |         |
| 8 h                              | 5.855    | 1.652         | 5.595    | 0.169            | 6.380    | 1.344          | 5.535    | 0.474   |
| 24 h                             | 6.160    | 0.130         | 5.435    | 0.359            | 5.815    | 0.247          | 5.305    | 1.391   |
| 48 h                             | 6.515    | 1.961         | 7.003    | 1.037            | 7.205    | 0.926          | 5.598    | 1.799   |
| 72 h                             | 7.405    | 1.130         | 9.403    | 2.730            | 8.870    | 2.588          | 6.173    | 1.092   |
| <b>Treatment with 85 nM E1-S</b> |          |               |          |                  |          |                |          |         |
| <b>Cell line</b>                 |          |               |          |                  |          |                |          |         |
| <b>HIO-80</b>                    |          | <b>OVSAHO</b> |          | <b>Kuramochi</b> |          | <b>COV 362</b> |          |         |
| mean                             | SD       | mean          | SD       | mean             | SD       | mean           | SD       |         |
| <b>E1-S levels (ng/mL)</b>       |          |               |          |                  |          |                |          |         |
| 8 h                              | 1237.500 | 160.702       | 1257.500 | 132.508          | 1287.500 | 324.178        | 1027.750 | 154.191 |
| 24 h                             | 1367.500 | 131.498       | 1041.000 | 124.582          | 1215.000 | 151.987        | 1006.000 | 75.666  |
| 48 h                             | 1205.000 | 128.712       | 1004.750 | 128.160          | 1180.000 | 185.203        | 936.000  | 140.359 |
| 72 h                             | 1117.500 | 51.881        | 815.500  | 75.518           | 1208.500 | 197.101        | 1010.750 | 93.785  |
| <b>E1 levels (ng/mL)</b>         |          |               |          |                  |          |                |          |         |
| 8 h                              | 2.365    | 1.300         | 6.598    | 4.214            | 6.875    | 1.647          | 0.589    | 0.451   |
| 24 h                             | 8.428    | 0.812         | 13.650   | 3.894            | 12.625   | 1.053          | 1.223    | 0.355   |
| 48 h                             | 14.525   | 2.421         | 26.575   | 5.551            | 19.900   | 4.551          | 1.600    | 0.301   |
| 72 h                             | 15.925   | 3.282         | 45.650   | 6.828            | 22.900   | 4.267          | 2.143    | 0.566   |
| <b>E2 levels (ng/mL)</b>         |          |               |          |                  |          |                |          |         |
| 8 h                              | 0.363    | 0.139         | 0.484    | 0.195            | 0.952    | 0.434          | 0.059    | 0.040   |
| 24 h                             | 0.640    | 0.177         | 1.345    | 0.188            | 0.884    | 0.159          | 0.099    | 0.029   |
| 48 h                             | 1.138    | 0.199         | 4.370    | 1.014            | 1.887    | 0.566          | 0.091    | 0.028   |
| 72 h                             | 1.468    | 0.452         | 10.543   | 4.355            | 2.305    | 0.285          | 0.124    | 0.067   |
| <b>E2-S levels (ng/mL)</b>       |          |               |          |                  |          |                |          |         |
| 8 h                              | 70.375   | 6.990         | 72.325   | 7.384            | 64.900   | 17.216         | 54.200   | 4.166   |
| 24 h                             | 77.400   | 7.006         | 60.550   | 6.283            | 61.625   | 7.695          | 52.875   | 8.045   |
| 48 h                             | 68.100   | 7.517         | 64.600   | 6.611            | 62.533   | 10.589         | 51.600   | 11.474  |
| 72 h                             | 68.650   | 4.015         | 64.200   | 12.686           | 66.775   | 11.215         | 56.400   | 2.936   |

**Supplementary Table S7:** Statistically significant differences in gene expression in HGSOC tissues.

| Compared genes              | Mean Diff. | Summary | Adjusted P Value |
|-----------------------------|------------|---------|------------------|
| <i>SLC10A6 vs. SLCO2B1</i>  | -899       | ***     | <0.0001          |
| <i>SLC10A6 vs. SLCO3A1</i>  | -1348      | ***     | <0.0001          |
| <i>SLC22A11 vs. SLCO2B1</i> | -898       | ***     | <0.0001          |
| <i>SLC22A11 vs. SLCO3A1</i> | -1347      | ***     | <0.0001          |
| <i>SLC22A7 vs. SLCO2B1</i>  | -900       | ***     | <0.0001          |
| <i>SLC22A7 vs. SLCO3A1</i>  | -1349      | ***     | <0.0001          |
| <i>SLC22A8 vs. SLCO2B1</i>  | -900       | ***     | <0.0001          |
| <i>SLC22A8 vs. SLCO3A1</i>  | -1350      | ***     | <0.0001          |
| <i>SLC22A9 vs. SLCO2B1</i>  | -900       | ***     | <0.0001          |
| <i>SLC22A9 vs. SLCO3A1</i>  | -1350      | ***     | <0.0001          |
| <i>SLCO1A2 vs. SLCO2B1</i>  | -840       | ***     | <0.0001          |
| <i>SLCO1A2 vs. SLCO3A1</i>  | -1289      | ***     | <0.0001          |
| <i>SLCO1B1 vs. SLCO2B1</i>  | -899       | ***     | <0.0001          |
| <i>SLCO1B1 vs. SLCO3A1</i>  | -1348      | ***     | <0.0001          |
| <i>SLCO1B3 vs. SLCO2B1</i>  | -858       | ***     | <0.0001          |
| <i>SLCO1B3 vs. SLCO3A1</i>  | -1307      | ***     | <0.0001          |
| <i>SLCO1C1 vs. SLCO2B1</i>  | -899       | ***     | <0.0001          |
| <i>SLCO1C1 vs. SLCO3A1</i>  | -1348      | ***     | <0.0001          |
| <i>SLCO2B1 vs. SLCO3A1</i>  | -449       | ***     | <0.0001          |
| <i>SLCO2B1 vs. SLCO4A1</i>  | 826        | ***     | <0.0001          |
| <i>SLCO2B1 vs. SLCO4C1</i>  | 876        | ***     | <0.0001          |
| <i>SLCO3A1 vs. SLCO4A1</i>  | 1275       | ***     | <0.0001          |
| <i>SLCO3A1 vs. SLCO4C1</i>  | 1325       | ***     | <0.0001          |
| <i>ABCC1 vs. ABCC11</i>     | 1570       | ***     | <0.0001          |
| <i>ABCC1 vs. ABCC4</i>      | 391        | ***     | <0.0001          |
| <i>ABCC1 vs. ABCG2</i>      | 1511       | ***     | <0.0001          |
| <i>ABCC1 vs. SLC51A</i>     | 1535       | ***     | <0.0001          |
| <i>ABCC1 vs. SLC51B</i>     | 1571       | ***     | <0.0001          |
| <i>ABCC11 vs. ABCC4</i>     | -1179      | ***     | <0.0001          |
| <i>ABCC4 vs. ABCG2</i>      | 1120       | ***     | <0.0001          |
| <i>ABCC4 vs. SLC51A</i>     | 1143       | ***     | <0.0001          |
| <i>ABCC4 vs. SLC51B</i>     | 1179       | ***     | <0.0001          |
| <i>HSD17B1 vs. HSD17B14</i> | -145       | **      | 0.0014           |
| <i>HSD17B1 vs. SULT2B1</i>  | 150        | ***     | 0.0006           |
| <i>HSD17B12 vs. HSD17B4</i> | 157        | ***     | 0.0002           |
| <i>AKR1C3 vs. CYP19A1</i>   | 267        | ***     | <0.0001          |
| <i>AKR1C3 vs. HSD17B10</i>  | -1871      | ***     | <0.0001          |
| <i>AKR1C3 vs. HSD17B12</i>  | -1610      | ***     | <0.0001          |
| <i>AKR1C3 vs. HSD17B2</i>   | 271        | ***     | <0.0001          |
| <i>AKR1C3 vs. HSD17B4</i>   | -1453      | ***     | <0.0001          |
| <i>AKR1C3 vs. HSD17B8</i>   | -203       | ***     | <0.0001          |
| <i>AKR1C3 vs. HSD3B1</i>    | 275        | ***     | <0.0001          |
| <i>AKR1C3 vs. HSD3B2</i>    | 266        | ***     | <0.0001          |
| <i>AKR1C3 vs. SULT1E1</i>   | 255        | ***     | <0.0001          |
| <i>AKR1C3 vs. SULT2A1</i>   | 270        | ***     | <0.0001          |
| <i>AKR1C3 vs. SULT2B1</i>   | 197        | ***     | <0.0001          |
| <i>CYP19A1 vs. HSD17B1</i>  | -220       | ***     | <0.0001          |

|                              |       |     |         |
|------------------------------|-------|-----|---------|
| <i>CYP19A1 vs. HSD17B10</i>  | -2138 | *** | <0.0001 |
| <i>CYP19A1 vs. HSD17B12</i>  | -1876 | *** | <0.0001 |
| <i>CYP19A1 vs. HSD17B14</i>  | -364  | *** | <0.0001 |
| <i>CYP19A1 vs. HSD17B4</i>   | -1720 | *** | <0.0001 |
| <i>CYP19A1 vs. HSD17B7</i>   | -257  | *** | <0.0001 |
| <i>CYP19A1 vs. HSD17B8</i>   | -469  | *** | <0.0001 |
| <i>CYP19A1 vs. STS</i>       | -306  | *** | <0.0001 |
| <i>HSD17B1 vs. HSD17B10</i>  | -1918 | *** | <0.0001 |
| <i>HSD17B1 vs. HSD17B12</i>  | -1657 | *** | <0.0001 |
| <i>HSD17B1 vs. HSD17B2</i>   | 224   | *** | <0.0001 |
| <i>HSD17B1 vs. HSD17B4</i>   | -1500 | *** | <0.0001 |
| <i>HSD17B1 vs. HSD17B8</i>   | -250  | *** | <0.0001 |
| <i>HSD17B1 vs. HSD3B1</i>    | 227   | *** | <0.0001 |
| <i>HSD17B1 vs. HSD3B2</i>    | 219   | *** | <0.0001 |
| <i>HSD17B1 vs. SULT1E1</i>   | 208   | *** | <0.0001 |
| <i>HSD17B1 vs. SULT2A1</i>   | 223   | *** | <0.0001 |
| <i>HSD17B10 vs. HSD17B12</i> | 262   | *** | <0.0001 |
| <i>HSD17B10 vs. HSD17B14</i> | 1774  | *** | <0.0001 |
| <i>HSD17B10 vs. HSD17B2</i>  | 2142  | *** | <0.0001 |
| <i>HSD17B10 vs. HSD17B4</i>  | 418   | *** | <0.0001 |
| <i>HSD17B10 vs. HSD17B7</i>  | 1881  | *** | <0.0001 |
| <i>HSD17B10 vs. HSD17B8</i>  | 1669  | *** | <0.0001 |
| <i>HSD17B10 vs. HSD3B1</i>   | 2146  | *** | <0.0001 |
| <i>HSD17B10 vs. HSD3B2</i>   | 2137  | *** | <0.0001 |
| <i>HSD17B10 vs. STS</i>      | 1832  | *** | <0.0001 |
| <i>HSD17B10 vs. SULT1E1</i>  | 2127  | *** | <0.0001 |
| <i>HSD17B10 vs. SULT2A1</i>  | 2141  | *** | <0.0001 |
| <i>HSD17B10 vs. SULT2B1</i>  | 2069  | *** | <0.0001 |
| <i>HSD17B12 vs. HSD17B14</i> | 1512  | *** | <0.0001 |
| <i>HSD17B12 vs. HSD17B2</i>  | 1880  | *** | <0.0001 |
| <i>HSD17B12 vs. HSD17B7</i>  | 1620  | *** | <0.0001 |
| <i>HSD17B12 vs. HSD17B8</i>  | 1407  | *** | <0.0001 |
| <i>HSD17B12 vs. HSD3B1</i>   | 1884  | *** | <0.0001 |
| <i>HSD17B12 vs. HSD3B2</i>   | 1876  | *** | <0.0001 |
| <i>HSD17B12 vs. STS</i>      | 1570  | *** | <0.0001 |
| <i>HSD17B12 vs. SULT1E1</i>  | 1865  | *** | <0.0001 |
| <i>HSD17B12 vs. SULT2A1</i>  | 1880  | *** | <0.0001 |
| <i>HSD17B12 vs. SULT2B1</i>  | 1807  | *** | <0.0001 |
| <i>HSD17B14 vs. HSD17B2</i>  | 368   | *** | <0.0001 |
| <i>HSD17B14 vs. HSD17B4</i>  | -1356 | *** | <0.0001 |
| <i>HSD17B14 vs. HSD3B1</i>   | 372   | *** | <0.0001 |
| <i>HSD17B14 vs. HSD3B2</i>   | 364   | *** | <0.0001 |
| <i>HSD17B14 vs. SULT1E1</i>  | 353   | *** | <0.0001 |
| <i>HSD17B14 vs. SULT2A1</i>  | 368   | *** | <0.0001 |
| <i>HSD17B14 vs. SULT2B1</i>  | 295   | *** | <0.0001 |
| <i>HSD17B2 vs. HSD17B4</i>   | -1724 | *** | <0.0001 |
| <i>HSD17B2 vs. HSD17B7</i>   | -261  | *** | <0.0001 |
| <i>HSD17B2 vs. HSD17B8</i>   | -473  | *** | <0.0001 |
| <i>HSD17B2 vs. STS</i>       | -310  | *** | <0.0001 |

|                            |        |     |         |
|----------------------------|--------|-----|---------|
| <i>HSD17B4 vs. HSD17B7</i> | 1463   | *** | <0.0001 |
| <i>HSD17B4 vs. HSD17B8</i> | 1251   | *** | <0.0001 |
| <i>HSD17B4 vs. HSD3B1</i>  | 1728   | *** | <0.0001 |
| <i>HSD17B4 vs. HSD3B2</i>  | 1719   | *** | <0.0001 |
| <i>HSD17B4 vs. STS</i>     | 1414   | *** | <0.0001 |
| <i>HSD17B4 vs. SULT1E1</i> | 1708   | *** | <0.0001 |
| <i>HSD17B4 vs. SULT2A1</i> | 1723   | *** | <0.0001 |
| <i>HSD17B4 vs. SULT2B1</i> | 1651   | *** | <0.0001 |
| <i>HSD17B7 vs. HSD17B8</i> | -213   | *** | <0.0001 |
| <i>HSD17B7 vs. HSD3B1</i>  | 264    | *** | <0.0001 |
| <i>HSD17B7 vs. HSD3B2</i>  | 256    | *** | <0.0001 |
| <i>HSD17B7 vs. SULT1E1</i> | 245    | *** | <0.0001 |
| <i>HSD17B7 vs. SULT2A1</i> | 260    | *** | <0.0001 |
| <i>HSD17B7 vs. SULT2B1</i> | 187    | *** | <0.0001 |
| <i>HSD17B8 vs. HSD3B1</i>  | 477    | *** | <0.0001 |
| <i>HSD17B8 vs. HSD3B2</i>  | 469    | *** | <0.0001 |
| <i>HSD17B8 vs. STS</i>     | 163    | *** | <0.0001 |
| <i>HSD17B8 vs. SULT1E1</i> | 458    | *** | <0.0001 |
| <i>HSD17B8 vs. SULT2A1</i> | 472    | *** | <0.0001 |
| <i>HSD17B8 vs. SULT2B1</i> | 400    | *** | <0.0001 |
| <i>HSD3B1 vs. STS</i>      | -314   | *** | <0.0001 |
| <i>HSD3B2 vs. STS</i>      | -306   | *** | <0.0001 |
| <i>STS vs. SULT1E1</i>     | 295    | *** | <0.0001 |
| <i>STS vs. SULT2A1</i>     | 309    | *** | <0.0001 |
| <i>STS vs. SULT2B1</i>     | 237    | *** | <0.0001 |
| <i>CYP1A2 vs. CYP1B1</i>   | -733   | **  | 0.0011  |
| <i>CYP1B1 vs. CYP3A5</i>   | 716    | **  | 0.0017  |
| <i>CYP1B1 vs. SULT2B1</i>  | 683    | **  | 0.0041  |
| <i>COMT vs. CYP1B1</i>     | 797    | *** | 0.0002  |
| <i>CYP1A1 vs. CYP1B1</i>   | -751   | *** | 0.0007  |
| <i>CYP1B1 vs. CYP3A7</i>   | 758    | *** | 0.0006  |
| <i>CYP1B1 vs. SULT1E1</i>  | 741    | *** | 0.0009  |
| <i>COMT vs. CYP1A1</i>     | 1548   | *** | <0.0001 |
| <i>COMT vs. CYP1A2</i>     | 1530   | *** | <0.0001 |
| <i>COMT vs. CYP3A5</i>     | 1513   | *** | <0.0001 |
| <i>COMT vs. CYP3A7</i>     | 1555   | *** | <0.0001 |
| <i>COMT vs. GSTP1</i>      | -12225 | *** | <0.0001 |
| <i>COMT vs. NQO2</i>       | 1159   | *** | <0.0001 |
| <i>COMT vs. SULT1A1</i>    | 1111   | *** | <0.0001 |
| <i>COMT vs. SULT1E1</i>    | 1538   | *** | <0.0001 |
| <i>COMT vs. SULT2B1</i>    | 1480   | *** | <0.0001 |
| <i>COMT vs. UGT2B7</i>     | 1235   | *** | <0.0001 |
| <i>CYP1A1 vs. GSTP1</i>    | -13773 | *** | <0.0001 |
| <i>CYP1A1 vs. NQO1</i>     | -1843  | *** | <0.0001 |
| <i>CYP1A2 vs. GSTP1</i>    | -13755 | *** | <0.0001 |
| <i>CYP1A2 vs. NQO1</i>     | -1825  | *** | <0.0001 |
| <i>CYP1B1 vs. GSTP1</i>    | -13022 | *** | <0.0001 |
| <i>CYP1B1 vs. NQO1</i>     | -1092  | *** | <0.0001 |
| <i>CYP3A5 vs. GSTP1</i>    | -13738 | *** | <0.0001 |

|                          |        |     |         |
|--------------------------|--------|-----|---------|
| <i>CYP3A5 vs. NQO1</i>   | -1808  | *** | <0.0001 |
| <i>CYP3A7 vs. GSTP1</i>  | -13780 | *** | <0.0001 |
| <i>CYP3A7 vs. NQO1</i>   | -1850  | *** | <0.0001 |
| <i>GSTP1 vs. NQO1</i>    | 11930  | *** | <0.0001 |
| <i>GSTP1 vs. NQO2</i>    | 13384  | *** | <0.0001 |
| <i>GSTP1 vs. SULT1A1</i> | 13336  | *** | <0.0001 |
| <i>GSTP1 vs. SULT1E1</i> | 13763  | *** | <0.0001 |
| <i>GSTP1 vs. SULT2B1</i> | 13705  | *** | <0.0001 |
| <i>GSTP1 vs. UGT2B7</i>  | 13460  | *** | <0.0001 |
| <i>NQO1 vs. NQO2</i>     | 1454   | *** | <0.0001 |
| <i>NQO1 vs. SULT1A1</i>  | 1406   | *** | <0.0001 |
| <i>NQO1 vs. SULT1E1</i>  | 1833   | *** | <0.0001 |
| <i>NQO1 vs. SULT2B1</i>  | 1775   | *** | <0.0001 |
| <i>NQO1 vs. UGT2B7</i>   | 1530   | *** | <0.0001 |
| <i>ESR1 vs. ESR2</i>     | 2743   | *** | <0.0001 |
| <i>ESR1 vs. GPER1</i>    | 2721   | *** | <0.0001 |

---

Statistical analysis: One-way ANOVA with Bonferroni corrections.

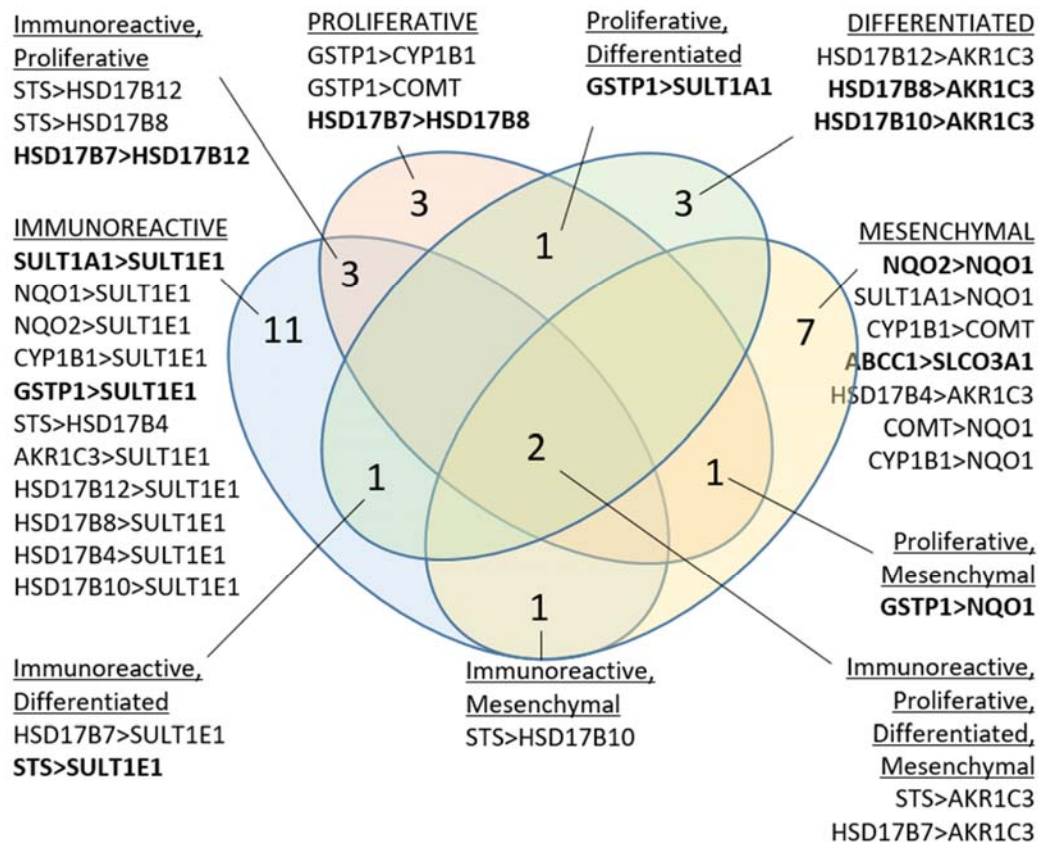

**Supplementary Figure S1.** Venn diagram representation of differential protein levels in HGSOC subtypes. Data from study Zhet al.t al, 2016 (TCGA Ovarian PNNL and JHU Proteome studies (IDs PDC000114, PDC000113)) were downloaded from the NCI, PDC server (<https://pdc.cancer.gov>) on 12. 1. 2022. Statistical analysis: One-way ANOVA with Bonferroni correction. »>« denotes »levels are higher than«.

Results indicate:

- in immunoreactive subtype: the preferential transformation of E1-S to E1 (STS>SULT1E1, 2.3-fold),
- in proliferative subtype: the preferential activation of E1 to E2 (HSD17B7>HSD17B8, 1.3-fold; HSD17B7>HSD17B12 1.3-fold) and higher formation of glutathione conjugates compared to catechols (GSTP1>NQO1, 1.6-fold) and catechol sulphates (GSTP1>SULT1A1, 1.4-fold),
- in differentiated subtype: the preferential transformation of E1-S to E1 (STS>SULT1E1, 1.7-fold) and higher formation of glutathione conjugates compared to sulfated catechols (GSTP1>SULT1A1, 1.4-fold),
- in mesenchymal subtype: higher efflux of steroid precursors (ABCC1>SLCO3A1, 1.4-fold) and higher formation of 4-OH-estrogens (NQO2>NQO1, 1.7-fold) and glutathione conjugates (GSTP1>NQO1, 1.6-fold) compared to 2-OH-estrogens.
